# Supplementary material for: Using a biocatalyzed reaction cycle for transient and pH-dependent host–guest supramolecular hydrogels
Source: Royal Society of Chemistry journal article supplement (doi:10.1039/d4tb00545g), 2024-01-01
Supplement: d4tb00545g4.pdf [file d4tb00545g4.pdf]

# Using A Biocatalyzed Reaction Cycle for Transient and pH-Dependent Host–Guest Supramolecular Hydrogels

Bo Su,<sup>†</sup> Teng Chi,<sup>†</sup> Weike Chen,<sup>†</sup> Sijie Xian,<sup>†</sup> Dongping Liu,<sup>†</sup> Christopher J. Addonizio,<sup>†</sup>  
Yuanhui Xiang,<sup>†</sup> Matthew J. Webber<sup>†,\*</sup>

<sup>†</sup>- Department of Chemical & Biomolecular Engineering, University of Notre Dame

\*- Address Correspondences to: 105 McCourtney Hall, Notre Dame, IN 46556 USA;  
[mwebber@nd.edu](mailto:mwebber@nd.edu)

## **Table of Contents:**

### **Supporting Data**

**Fig. S1-** pH profile of a dissipative hydrogel sample in a reaction cycle.

**Fig. S2-** pH titration for pKa estimation of BO guest.

**Fig. S3-** Rheology time sweep of a cycling experiment ([urea] = 24 mM, [CA/Na<sub>3</sub>C] = 12 mM).

**Fig. S4-** Standard curve of FITC-dextran.

**Supporting Data:**

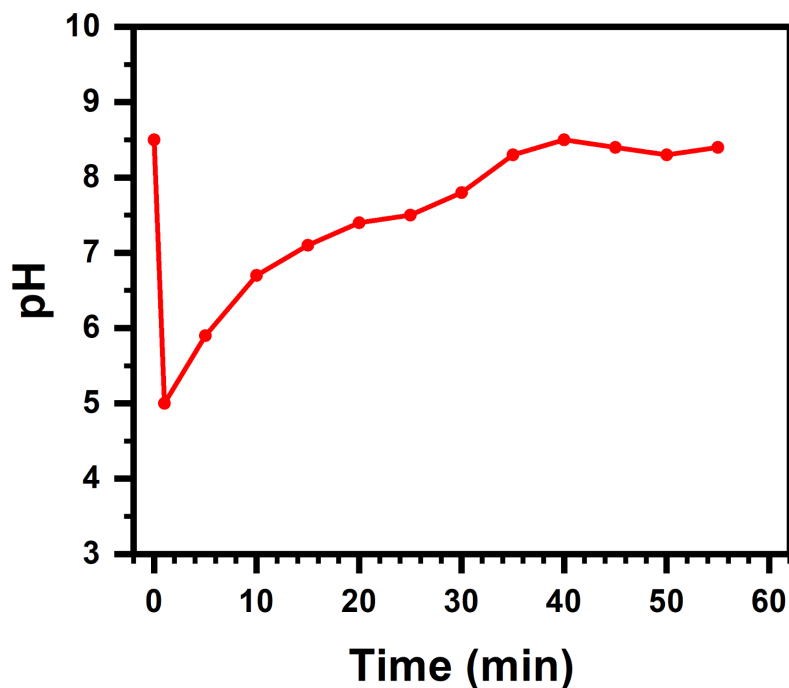

**Figure S1.** pH profile of a sample throughout the course of a single reaction cycle. Samples of PEG<sub>8a</sub>-BO(-)- PEG<sub>4a</sub>-CB[7] at 4% w/v and 1:1 by mol were prepared in DI water at pH 8.5 with 1.0 g/L urease. At t=0, urea (36 mM) and citric acid buffer (12 mM).

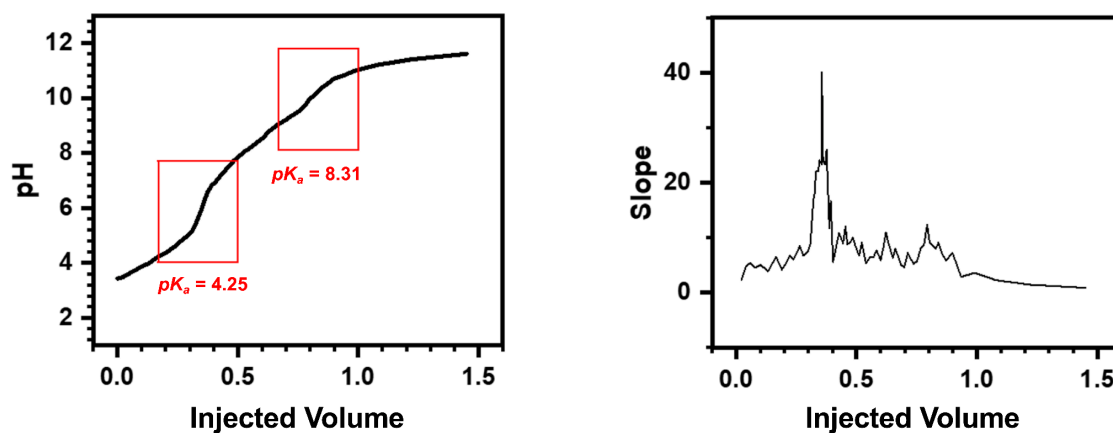

**Figure S2.** pH titration to estimate  $pK_a$  values for the BO guest alone.

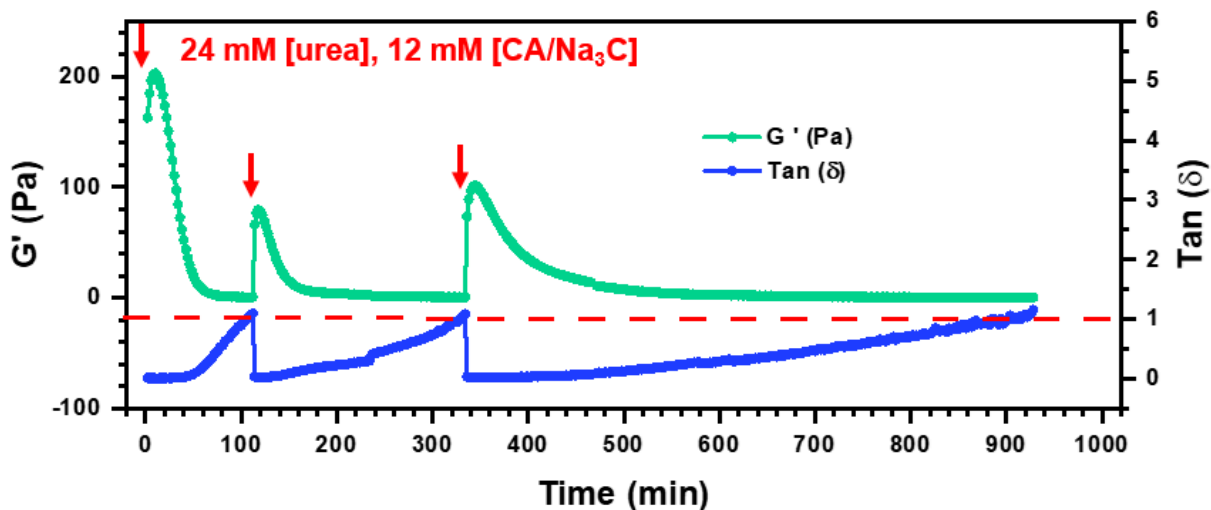

**Figure S3.** Rheology time-course study ( $G'$  and  $\tan \delta$ ) for the cycling of 4% w/v PEG<sub>8a</sub>-BO(-) and PEG<sub>4a</sub>-CB[7] hydrogels containing [urease] = 1.0 g/L. At each time (*red arrows*), [urea] = 24 mM, and [CA] = 12 mM was added.

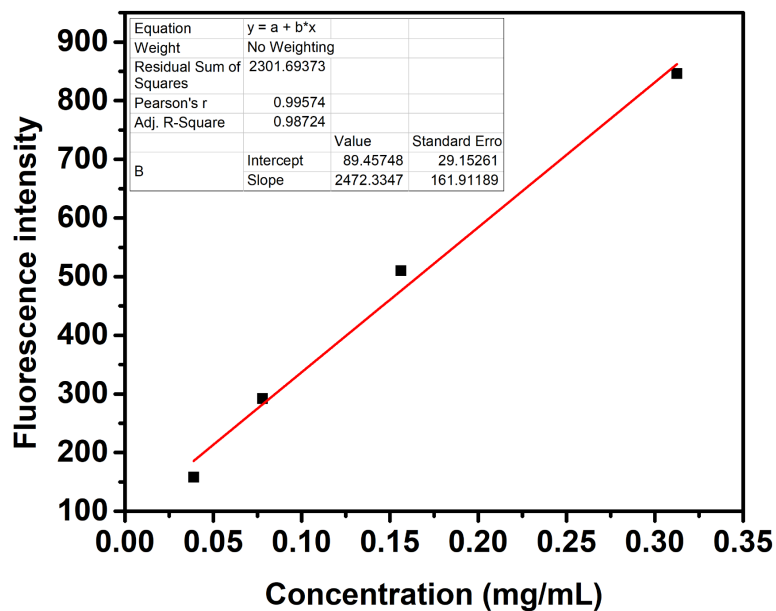

**Figure S4.** Standard curve of FITC-dextran.
